# Supplementary material
Source: Research Square preprint supplement (doi:10.21203/rs.3.rs-8727386/v1)
Supplement: Supplementary file 1 [file def5796b809b4ad8f2d40954.docx]

**Supplementary Table 1. ICD-10-CM/PCS codes used to define exposures, outcomes, and covariates**

*(Diagnosis codes are ICD-10-CM; procedure codes are ICD-10-PCS. Codes are shown without decimals.)*

| **Condition** | **ICD code(s)** |
| --- | --- |
| **Pneumococcal disease (pneumococcal pneumonia/IPD proxy)** | J13; B953; G001; A403 |
| **Hematologic malignancy (C81–C96)** | C81*; C82*; C83*; C84*; C85*; C86*; C87*; C88*; C89*; C90*; C91*; C92*; C93*; C94*; C95*; C96* |
| **B-cell hematologic malignancy** | C82*; C831*; C833*; C837*; C880*; C90*; C911*; C914* |
| **Severe sepsis (with/without shock)** | R6520; R6521 |
| **Ventilator procedure performed** *(ICD-10-PCS)* | 5A1935Z; 5A1945Z; 5A1955Z; 5A1522F; 5A1522G |
| **Myocardial infarction (CCI component)** | I21*; I22*; I252* |
| **Congestive heart failure (CCI component)** | I42*; I43*; I50*; I099; I110; I130; I132; I255; I420; I425; I426; I427; I428; I429; P290 |
| **Peripheral vascular disease (CCI component)** | I70*; I71*; I731; I738; I739; I771; I790; I792; K551; K558; K559; Z958; Z959 |
| **Cerebrovascular disease (CCI component)** | G45*; G46*; I60*; I61*; I62*; I63*; I64*; I65*; I66*; I67*; I68*; I69*; H340 |
| **Dementia (CCI component)** | F00*; F01*; F02*; F03*; F051; G30*; G311 |
| **Chronic pulmonary disease (CCI component)** | I278; I279; J40*; J41*; J42*; J43*; J44*; J45*; J46*; J47*; J60*; J61*; J62*; J63*; J64*; J65*; J66*; J67*; J684; J701; J703 |
| **Rheumatic disease (CCI component)** | M05*; M06*; M315; M32*; M33*; M34*; M351; M353; M360 |
| **Peptic ulcer disease (CCI component)** | K25*; K26*; K27*; K28* |
| **Mild liver disease (CCI component)** | K700; K701; K702; K703; K709; K713; K714; K715; K717; K760; K762; K763; K764; K768; K769; B18*; Z944 |
| **Diabetes without complications (CCI component)** | E100; E101; E106; E108; E109; E110; E111; E116; E118; E119; E120; E121; E126; E128; E129; E130; E131; E136; E138; E139; E140; E141; E146; E148; E149 |
| **Diabetes with complications (CCI component)** | E102; E103; E104; E105; E107; E112; E113; E114; E115; E117; E122; E123; E124; E125; E127; E132; E133; E134; E135; E137; E142; E143; E144; E145; E147 |
| **Hemiplegia/paraplegia (CCI component)** | G041; G114; G801; G802; G81*; G82*; G830; G831; G832; G833; G834; G839 |
| **Renal disease (CCI component)** | I120; I131; N032; N033; N034; N035; N036; N037; N052; N053; N054; N055; N056; N057; N18*; N19*; N250; Z490; Z491; Z492; Z940; Z992 |
| **Any malignancy (CCI component)** | C00*; C01*; C02*; C03*; C04*; C05*; C06*; C07*; C08*; C09*; C10*; C11*; C12*; C13*; C14*; C15*; C16*; C17*; C18*; C19*; C20*; C21*; C22*; C23*; C24*; C25*; C26*; C30*; C31*; C32*; C33*; C34*; C37*; C38*; C39*; C40*; C41*; C43*; C45*; C46*; C47*; C48*; C49*; C50*; C51*; C52*; C53*; C54*; C55*; C56*; C57*; C58*; C60*; C61*; C62*; C63*; C64*; C65*; C66*; C67*; C68*; C69*; C70*; C71*; C72*; C73*; C74*; C75*; C76*; C81*; C82*; C83*; C84*; C85*; C88*; C90*; C91*; C92*; C93*; C94*; C95*; C96*; C97* |
| **Moderate/severe liver disease (CCI component)** | I850; I859; I864; I982; K704; K711; K721; K729; K765; K766; K767 |
| **Metastatic solid tumor (CCI component)** | C77*; C78*; C79*; C80* |
| **AIDS/HIV (CCI component)** | B20*; B21*; B22*; B24*; Z21 |
| **Smoking status (smoker)** | F17200; F17210; F17220; F17290 |
| **Alcohol use** | F1010; F1020; F10210; F10230; F10240 |
| **Pulmonary embolism** | I2601; I2602; I2603; I2604; I2609; I2690; I2692; I2693; I2694; I2695; I2696; I2699 |
| **Right heart failure** | I50810; I50811; I50812; I50813; I50814 |
| **Cardiogenic shock** | R570 |
| **Cardiac arrest** | I462; I468; I469 |
| **Malnutrition** | E368; E40; E41; E42; E43; E440; E441 |
| **Venous thrombosis (VTE composite)** | I26*; I824*; I824Y1; I824Y2; I824Y3; I824Y9; I824Z1; I824Z2; I824Z3; I824Z9; I822*; I8221; I8229; I801*; I802*; I81; I823; I820; I821; I828*; G08; I676; H3481*; H3482*; O2250*; O2251*; O2252*; O2253* |
| **Arterial thrombosis** | I6302; I63011; I63013; I63019; I63031; I63033; I63039; I6309; I63341; I63343; I6339; I63349; I63541; I63542; I63543; I63549; I6359; I638; I6381; I6389; I639; I2101; I2102; I2109; I2111; I2119; I2121; I2129; I213; I214; I219; I21A1; I21A9; I220; I221; I222; I228; I229; I230; I240; I249; I513; H3410; H3411; H3412; H3413; H34211; H34212; H34213; H34219; H34231; H34232; H34233; H34239; I748; I740; I7401; I7409; I7410; I7411; I7419; I742; I743; I744; I745; I749; K5501; K5502; N280; D735; G45*; T82855A; N4402; N8302; E273 |
| **Any thrombosis (composite)** | ARTYES or VTEYES (derived composite) |
| **Platelet transfusion** *(ICD-10-PCS)* | 30233R1; 30243R1; 30253R1; 30263R1; 30273R1 |
| **Plasma exchange** *(ICD-10-PCS)* | 6A550Z3; 6A551Z3; 6A552Z3 |
| **Intravenous immunoglobulin (IVIG)** *(ICD-10-PCS)* | XW133D7; XW143D7; 30233S0; 30233S1; 30243S0; 30243S1; XW133E7; XW143E7 |
| **History of thrombosis** | Z8671; Z8672; Z8679; Z87890 |
| **Stem cell transplant** *(ICD-10-PCS)* | 30243G0; 30243G1; 30243G2; 30240X3; 30243AZ |
| **Autologous stem cell transplant** *(ICD-10-PCS)* | 30243G0; 30243G1 |
| **Allogeneic stem cell transplant** *(ICD-10-PCS)* | 30243G2; 30240X3 |
| **Immune thrombocytopenic purpura (ITP)** | D693 |
| **Heparin-induced thrombocytopenia (HIT)** | D7582 |
| **Thrombotic thrombocytopenic purpura (TTP)** | M311 |
| **Other primary thrombocytopenia** | D6949 |
| **Gastrointestinal bleeding** | K250; K252; K254; K256; K260; K262; K264; K266; K270; K272; K274; K276; K280; K282; K284; K286; K290; K625; K920; K921; K922; I850; I983 |
| **Intracranial hemorrhage** | I60*; I600; I601; I602; I603; I604; I605; I606; I607; I608; I609; I61*; I610; I611; I612; I613; I614; I615; I616; I617; I618; I619; I62*; I620; I621; I629; S063; S064; S065; S066 |
| **Other bleeding** | D500; D62; H113; H356; H431; J942; M250; N02*; N020; N021; N022; N023; N024; N025; N026; N027; N028; N029; N950; R04*; R040; R041; R042; R048; R049; R31*; R58 |
| **Any major bleeding (composite)** | GI_bleed or intracranial_bleed or other_bleed (derived composite) |
| **ST-elevation MI (STEMI subtype)** | I210*; I211*; I212*; I213* |
| **Non-ST elevation MI (NSTEMI subtype)** | I214* |
| **Unstable angina** | I200* |
| **Acute MI, unspecified** | I219* |
| **Acute ischemic heart disease, unspecified** | I249* |
| **Acute coronary syndrome (ACS composite)** | I200*; I21*; I249* |
| **Severe septic shock (subset)** | R6521 |
| **Shock (cardiogenic or severe septic shock composite)** | R570; R6521 |
